# Supplementary material for: Synthesis and characterization of thiol-stabilized gold nanoparticles appended to bis(pyrazole) pyridine for fabrication of rectangular nano/microstripes and their spin crossover and SERS studies
Source: Royal Society of Chemistry journal article supplement (doi:10.1039/d5ra05105c), 2025-01-01
Supplement: d5ra05105c1.pdf [file d5ra05105c1.pdf]

## Electronic supporting information

# Synthesis and Characterization of Thiol-Stabilized Gold Nanoparticles Appended to Bis(pyrazole) pyridine for Fabrication of Rectangular Nano/Microstripes and Their Spin Crossover and SERS Studies

Ajay Kumar Botcha\*,<sup>a</sup> and Yemineni S. L. V. Narayana\*<sup>b</sup>

*a. Senior lecture, sri chatanya college, Gajuwaka, chinagatyada, Vizag, Andhra Pradesh, India, 530016*

*b. Assistant Professor, Department of chemistry, School of Applied Sciences & Humanities, Vignan's Foundation for Science, Technology and Research, Vadlamudi, Guntur, Andhra Pradesh, India, 522213*

*Email: Akchemistry@gmail.com; slvnarayanay@gmail.com; drysn\_chmstry@vignan.ac.in*

### This supporting information contains:

|                                                                                                                             |       |
|-----------------------------------------------------------------------------------------------------------------------------|-------|
| General methods                                                                                                             | 2-3   |
| <sup>1</sup> H NMR, <sup>13</sup> C NMR spectra of 6 to 8, <sup>1</sup> H NMR of L3 and <sup>13</sup> C NMR spectrum of 10. | 4-7   |
| LC MS of 6 to 8 and L3                                                                                                      | 8-11  |
| Elemental Analysis of 7, 8, L3 and 9                                                                                        | 12-15 |
| Comparative Raman spectra of 9 and L3                                                                                       | 16    |
| FTIR of L3, L4 and 10                                                                                                       | 17    |
| Confocal Raman image of rectangle microstripes                                                                              | 18    |
| Tindal effect of L4                                                                                                         | 18    |

### General experimental methods:

$^1\text{H}$  and  $^{13}\text{C}$  NMR spectroscopic data were recorded on a Bruker DPX 400 spectrometer with solvent proton as internal standard. Deuterated solvents  $\text{CDCl}_3$ - $d_1$ , and  $\text{DMSO}-d_6$  were obtained from Aldrich. Column chromatography was performed using Acme's silica gel (particle size 0.063-0.200 mm). GCMS mass spectrometry was performed on Shimadzu GCMS-QP2010 mass spectrometer. IR spectra were recorded on JASCO FT/IR-5300 and Thermo Nicolet FT/IR-5700. Elemental analyses were recorded on a Thermo Finnigan Flash EA 1112 analyzer. For thin-layer chromatography (TLC), silica gel plates Merck 60 F254 were used and compounds were visualized by irradiation with UV light.

**Materials:** Citrazinic acid,  $(\text{COCl})_2$ ,  $\text{I}_2$ , trifluoro acetic acid, tetramethylammonium chloride,  $[\text{Pd}(\text{PPh}_3)_4]$ , Tosylchloride,  $\text{LiBr}$ ,  $\text{HAuCl}_4$ ,  $\text{H}_2\text{O}$ ,  $\text{NaBH}_4$ , TOAB,  $\text{Fe}(\text{ClO}_4)_2 \cdot \text{H}_2\text{O}$  were obtained from Aldrich.  $\text{K}_2\text{CO}_3$ ,  $\text{LiOH}$ ,  $\text{NaOH}$ , thio urea,  $\text{Cu}(\text{I})\text{I}$ ,  $\text{PPh}_3$  obtained from Avra Synthesis, Hyderabad, India. THF, Triethylamine, benzene, dichloromethane, hexane, pet-ether,  $\text{CHCl}_3$  and methanol solvents were obtained from Finar Chemicals Limited, Ahmedabad, India. All solvent was used after distillation. Methanol,  $\text{HCl}$  and  $\text{NaN}_3$  obtained from Merck.  $\text{MgSO}_4$  and  $\text{Na}_2\text{S}_2\text{O}_3$  were purchased from SRL chemicals.pvt. limited, Hyderabad.

### Instrumentation details:

$^1\text{H}$  and  $^{13}\text{C}$  NMR spectroscopy data were recorded on a Bruker DPX 500 MHz spectrometer with solvent proton as an internal standard ( $\text{CDCl}_3$ - $d_1 = 7.26$  ppm). LC mass spectrometry was performed on Shimadzu LCMS-2010A mass spectrometer. ESI-Mass spectrometry was performed on Bruker maXis ESI-TOF spectrometer. IR spectra were recorded on a JASCO FT/IR-5300 or Nicolet 5700 FT-IR instrument equipped with ATR attachment. Elemental analysis was recorded on a C H N analysis Thermo Finnigan Flash EA 1112 analyzer instrument. UV-Visible absorption spectra were recorded on a spectrophotometer Cary-100, Varian. For thin-layer chromatography (TLC), silica gel plates Merck 60 F254 were used and compounds were visualized by irradiation with UV light.

**Bulk Magnetic Studies:** The temperature dependent magnetic susceptibility of complex I in the powder state was measured on a Quantum Design vibrating sample magnetometer (VSM-SQUID) setup in the temperature range of  $340 \leftrightarrow 2$  K at continuous cooling ( $\downarrow$ ) and heating ( $\uparrow$ ) cycles with an applied direct current (DC) magnetic field of 0.5 T. Heating and cooling rate of the sample was kept at a 10 K interval in sweep mode.

**TEM measurement:** It was carried out on Tecnai G2 FEI F12 instrument at an accelerating voltage of 120 kV. Carbon coated TEM grids (200 Mesh Type B) were purchased from Ted Pella Inc. U.S.A.

3.2.4. Method for Patterning. Micro patterning of complex **10** was carried out by drop casting 20  $\mu\text{L}$  of a 2 mg/mL solution of complex I in acetonitrile (Aldrich,  $\geq 99\%$  purity) on glass substrate. The

substrate was cleaned by sonication for 2 min in electronic-grade water (Milli-Q-pure quality), 2 min in acetone (Aldrich chromatography quality), and then with 2-propanol (Aldrich spectroscopic-grade quality). Before micro patterning the solution of compound I was filtered through a Whatman filter paper.

**Poly(dimethylsiloxane) (PDMS) stamps for lithography:** Elastomeric PDMS (Sylgard 184 Dow Corning) stamps were prepared by replica molding of a structured master (NTMDT AFM test gratings-TGZ3). The curing process was carried out at 60 °C for 6 h. Once cured, the replica was carefully peeled-off from the master and used as such for micropatterning techniques.

**Atomic Force Microscopy (AFM):** AFM imaging was carried out on NT-MDT Model Solver Pro M microscope using a class 2R laser of 650 nm wavelength having maximum output of 1 mW. All calculations and image processing was carried out by a software NOVA 1.0.26.1443 provided by the manufacturer. The images were recorded in a semicontact mode using a noncontact silicon cantilever (NSG10-DLC) tip purchased from NT-MDT, Moscow. The dimension of the tip is as follows: cantilever length = 100 ( $\pm 5$ )  $\mu\text{m}$ , cantilever width 35 ( $\pm 5$ )  $\mu\text{m}$ , and cantilever thickness = 1.7–2.3  $\mu\text{m}$ , resonate frequency = 190–325 kHz, force constant = 5.5–22.5 N/m, chip size = 3.6  $\times$  1.6  $\times$  0.4 mm, reflective side = Au, tip height = 10–20  $\mu\text{m}$ , tip curvature radius = 1–3 nm, and aspect ratio 3:1–5:1.

**Confocal Raman micro spectroscopy studies.** Raman spectra of the samples were recorded on a WI-Tec confocal Raman spectrometer equipped with a Peltier-cooled CCD detector. Using a 600 grooves/mm grating BLZ = 500 nm, the accumulation time was typically 10 s and integration time was typically 2.0000 s. Ten accumulations was performed for acquiring a single spectrum. For imaging the integration time was typically 2.000 s, keeping in mind that the x or y resolution is  $\sim 250$  nm four points per line and four line per image was taken for imaging of a 1  $\mu\text{m} \times 1 \mu\text{m}$  area. A He–Ne 633 nm laser was used as an excitation source for the Raman scattering. All measurements were done at ambient conditions.

**SERS Experiments:** Experiments were conducted using complex 10 coated on silicon wafer, as the SERS substrate. Complex 9 was used as the analyte molecule; 10  $\mu\text{L}$  of 0.4  $\mu\text{M}$  solution of complex 9 in methanol was spread uniformly on the substrate and dried under ambient atmosphere. A WITec model Alpha 300 R Raman microscope was used for recording the Raman spectra, with 0.5 s integration time and 10 accumulations, through a 100 $\times$  aperture (NA = 0.89). A 633 nm He-Ne laser with 12 m Watt power was used as the excitation source. The laser intensity was maintained constant in all measurements; a 100  $\mu\text{m}$  detecting fiber was used to collect the spectra. A Raman spectrum for the bulk material used as the reference was recorded using a small amount of complex 9 powdered placed on the Si wafer.

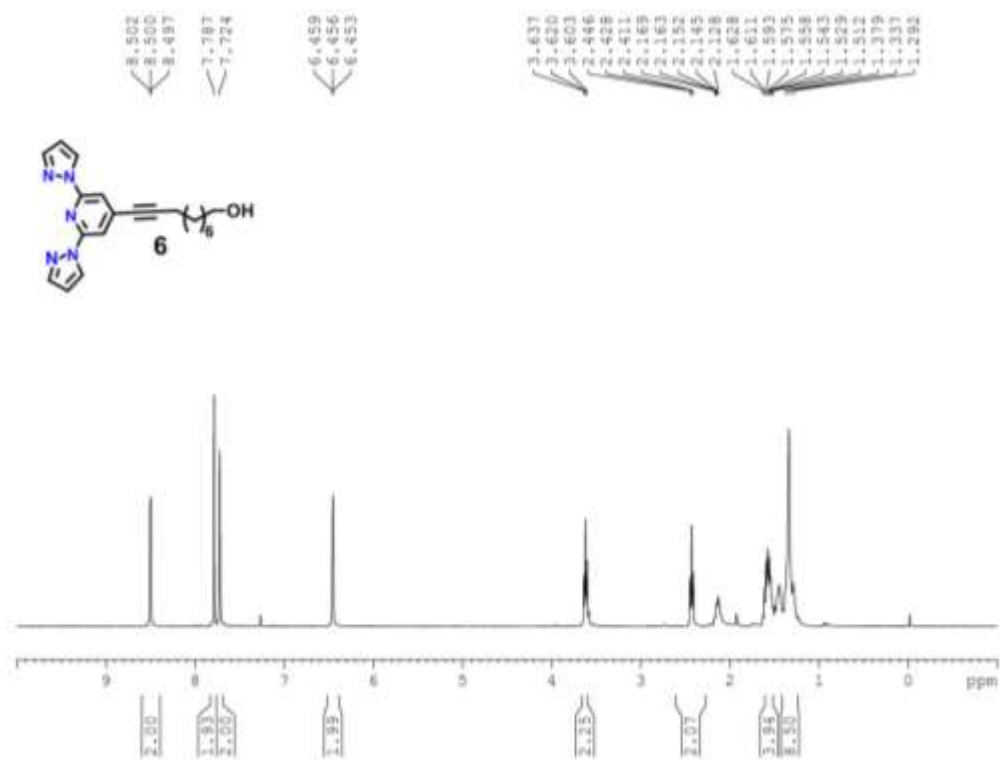Fig. S1 <sup>1</sup>H-NMR Spectrum of compound 6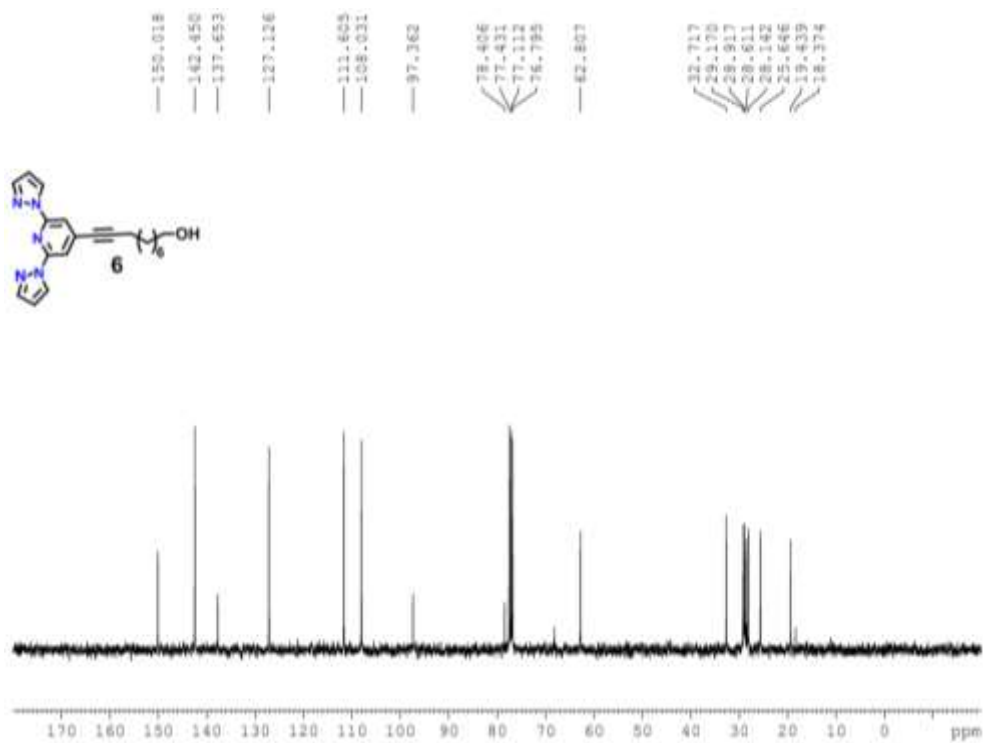Fig. S2 <sup>13</sup>C-NMR Spectrum of compound 6

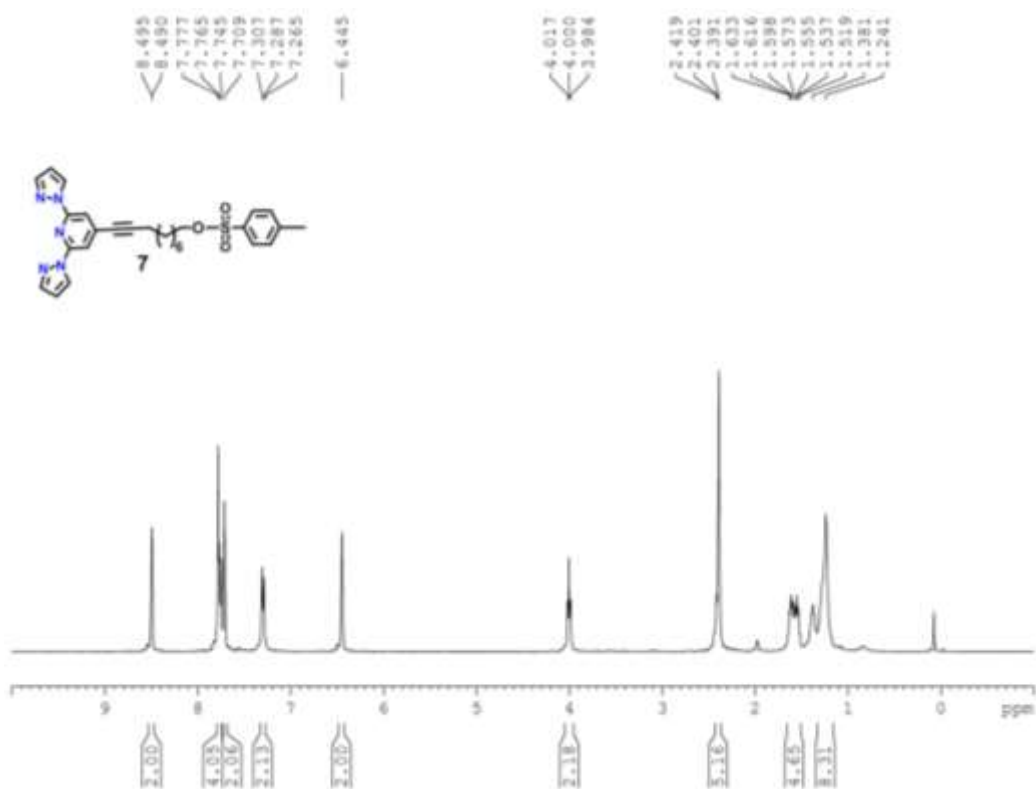Fig. S3 <sup>1</sup>H-NMR Spectrum of compound 7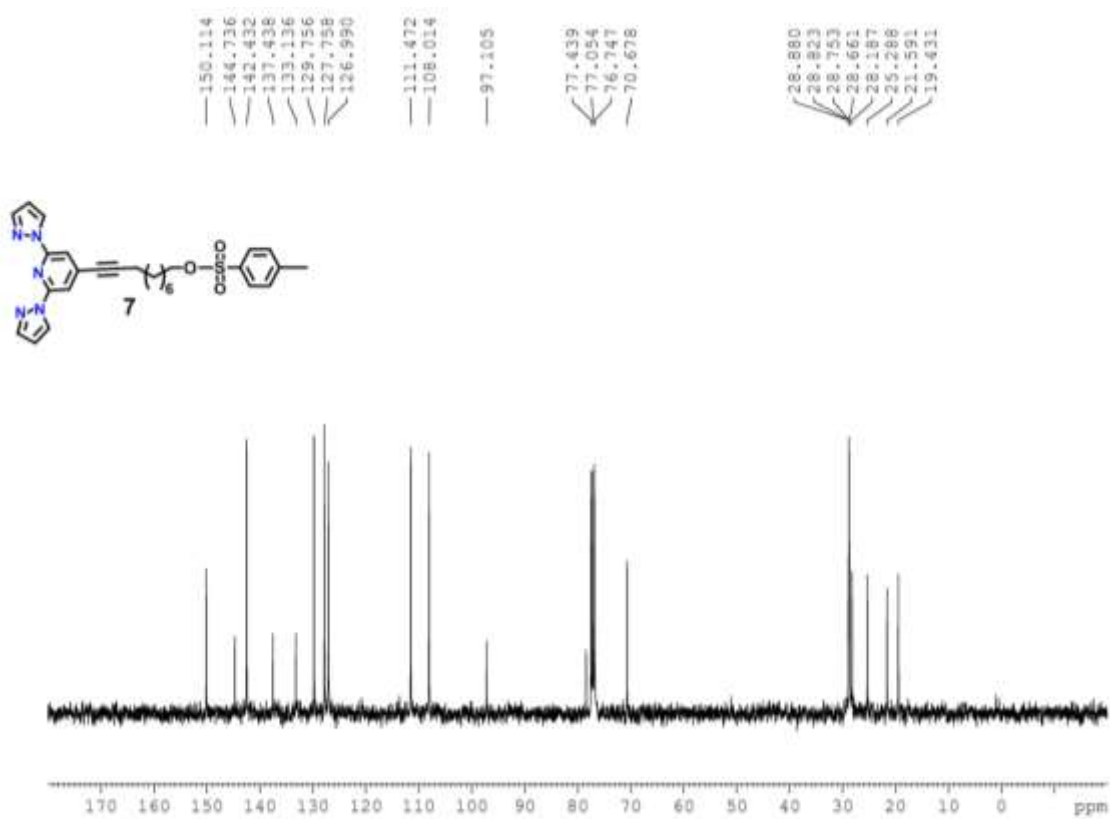Fig. S4 <sup>13</sup>C-NMR Spectrum of compound 7

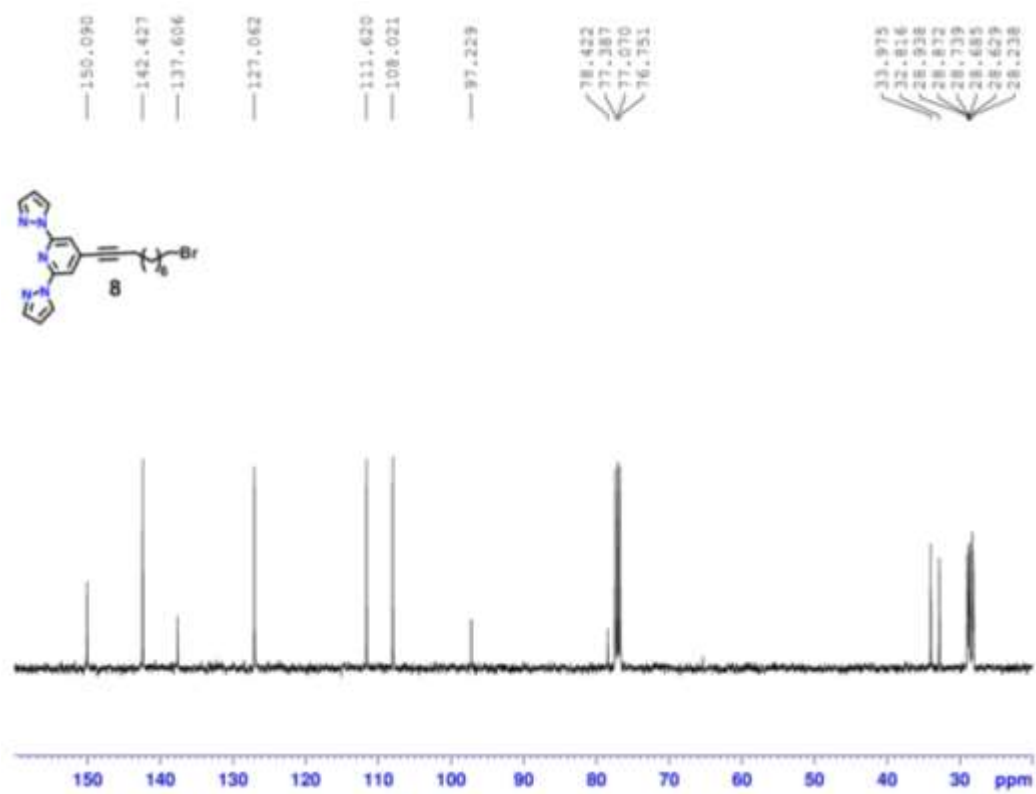

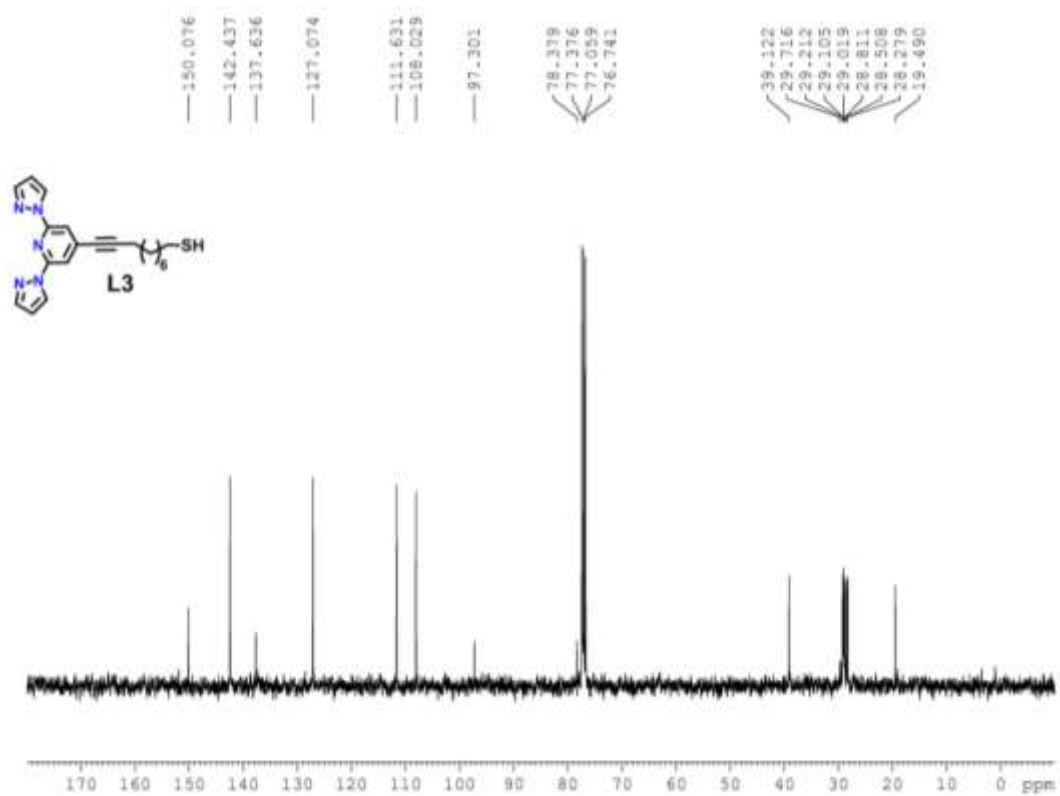Fig. S7 <sup>13</sup>C-NMR Spectrum of L3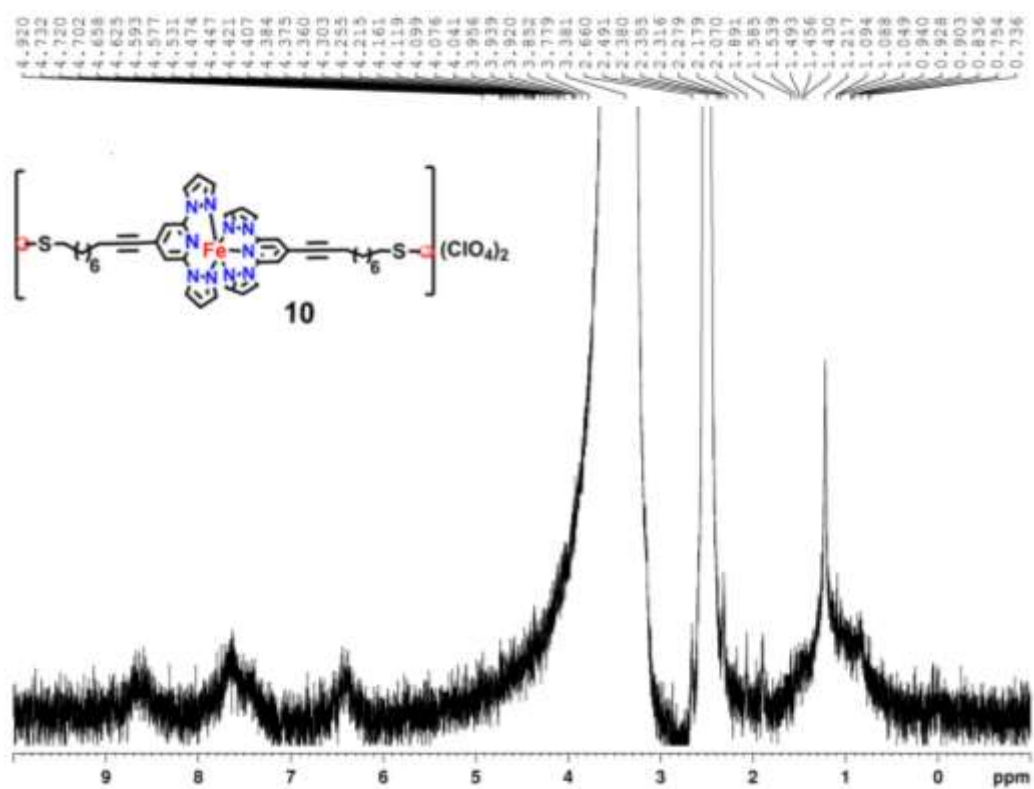

**LCMS-2010A DATA REPORT  
SCHOOL OF CHEMISTRY  
UNIVERSITY OF HYDERABAD**

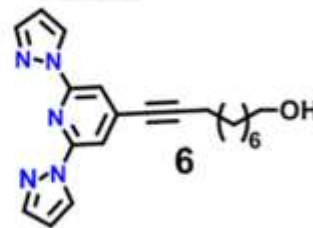

User : Admin  
Sample : AJAYSG  
Inj. Volume : 5.000  
Data Name : C:\LCMSsolution\User\Data\AJAYSG-ESI-POS1.qld  
Method Name : C:\LCMSsolution\User\Method\esi.qlm

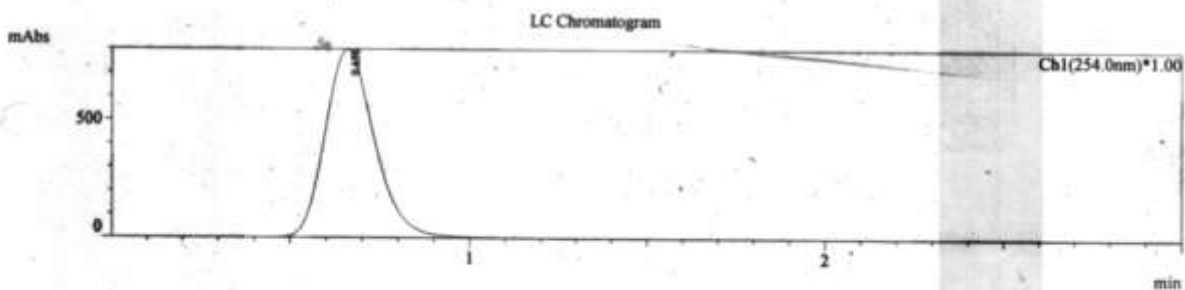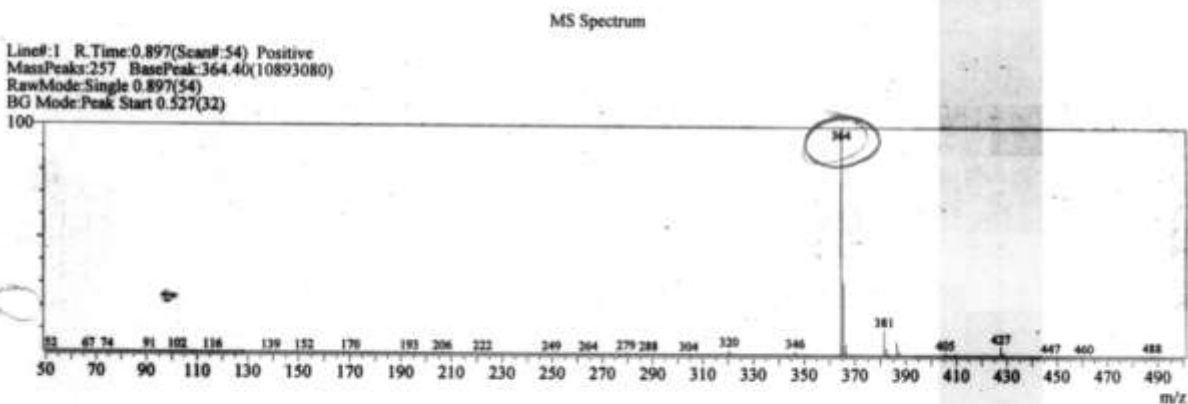

| MS Peak Table |        |        |        |          |         |       |      |        |      |
|---------------|--------|--------|--------|----------|---------|-------|------|--------|------|
| Peak#         | R.Time | I.Time | F.Time | Area     | Height  | A/H   | Mark | %Total | Name |
| 1             | 0.897  | 0.527  | 1.043  | 83035536 | 3466592 | 23.95 |      | 100.00 |      |
|               |        |        |        | 83035536 | 3466592 |       |      | 100.00 |      |

Base m/z Base Int.  
364.40 10893080

OPERATOR

Fig. S9 LC-MS of compound 6



SCHOOL OF CHEMISTRY  
UNIVERSITY OF HYDERAB

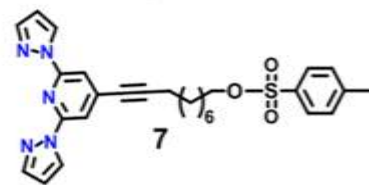

User : Admin  
Sample : AJAY-OTS  
Inj. Volume : 5.000  
Data Name : C:\LCMSsolution\User\Data\AJAY-OTS-APCI-POS1.qld  
Method Name : C:\LCMSsolution\User\Method\esi.qlm

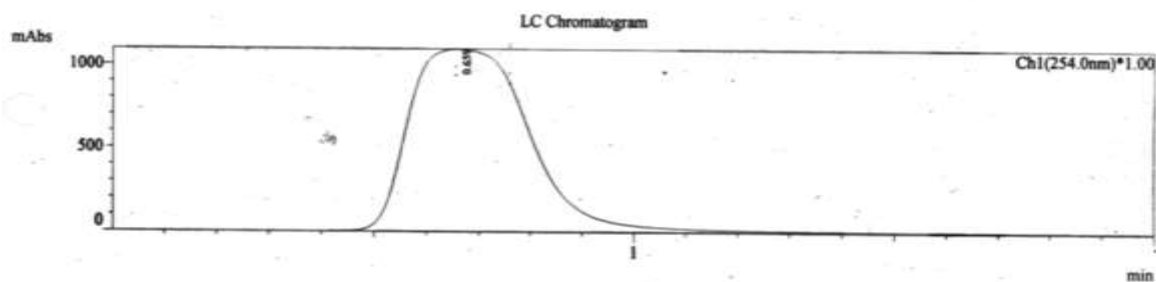

Line#1 R.Time:0.794(Scan#:48) Positive  
MassPeaks:389 BasePeak:518.45(10500209)  
RawMode:Single 0.794(48)  
BG Mode:Peak Start 0.527(32)

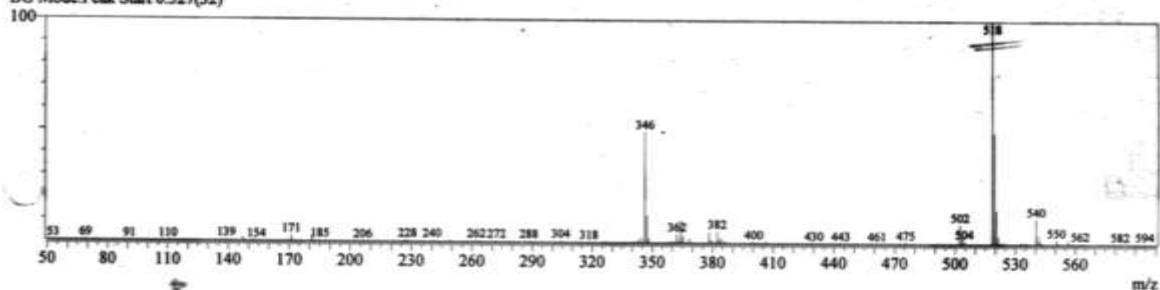

| Peak# | R.Time | I.Time | F.Time | Area      | Height   | A/H   | Mark | %Total | Name |
|-------|--------|--------|--------|-----------|----------|-------|------|--------|------|
| 1     | 0.794  | 0.527  | 1.043  | 313364310 | 16297525 | 19.22 |      | 100.00 |      |
|       |        |        |        | 313364310 | 16297525 |       |      | 100.00 |      |

Base m/z Base Int.  
518.45 10500209

OPERATOR

Fig. S10 LC-MS of compound 7

# LCMS-2010A DATA REPORT SCHOOL OF CHEMISTRY UNIVERSITY OF HYDERABAD

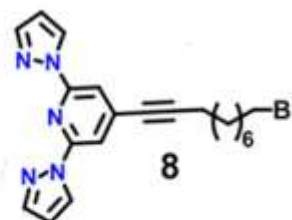

User : Admin  
Sample : AJAYBR  
Inj. Volume : 5.000  
Data Name : C:\LCMSsolution\User\Data\AJAYBR-ESI-POS1.qld  
Method Name : C:\LCMSsolution\User\Method\esi.qlm

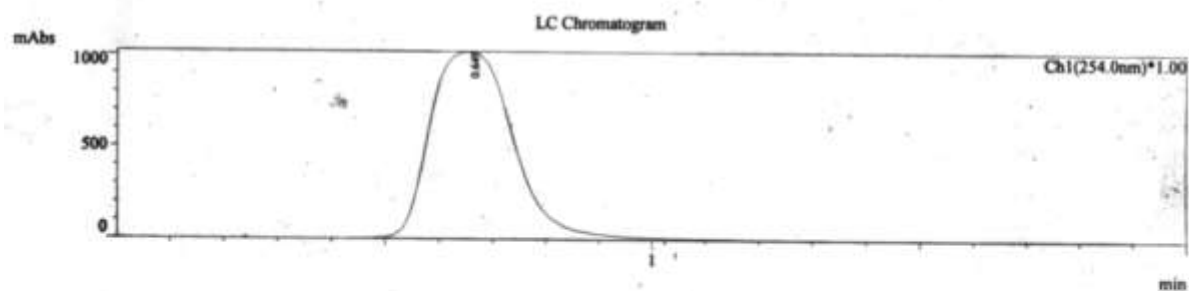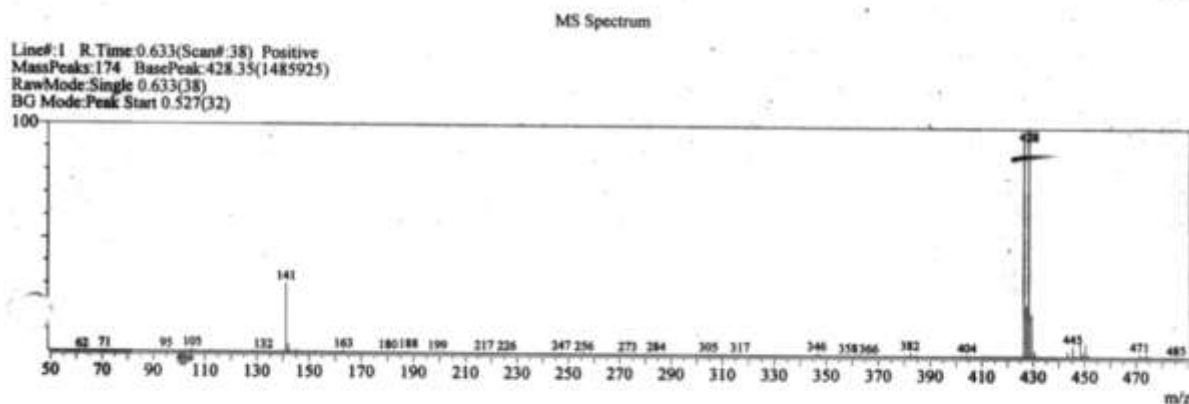

| Peak# | R.Time | I.Time | F.Time | Area     | Height  | A/H  | Mark | %Total | Name | Base m/z | Base Int. |
|-------|--------|--------|--------|----------|---------|------|------|--------|------|----------|-----------|
| 1     | 0.633  | 0.527  | 0.743  | 28889768 | 4729383 | 6.10 |      | 100.00 |      | 428.35   | 1485925   |
|       |        |        |        | 28889768 | 4729383 |      |      | 100.00 |      |          |           |

  
OPERATOR

Fig. S11 LC-MS of compound 8

# LCMS-2010A DATA REPORT SCHOOL OF CHEMISTRY UNIVERSITY OF HYDERABAD

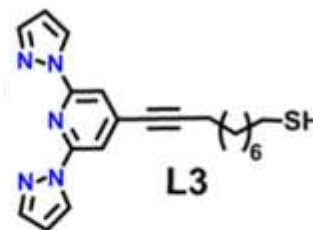

User : Admin  
Sample : SH  
Inj. Volume : 5.000  
Data Name : C:\LCMSsolution\User\Data\SH-APCI-POS1.qld  
Method Name : C:\LCMSsolution\User\Method\esi.qlm

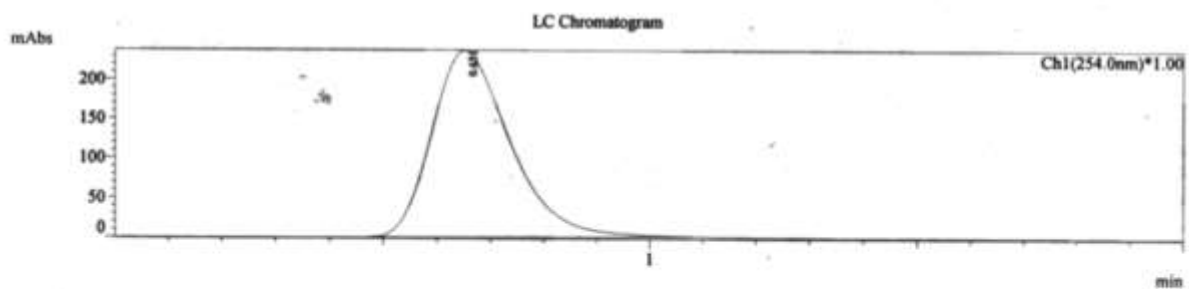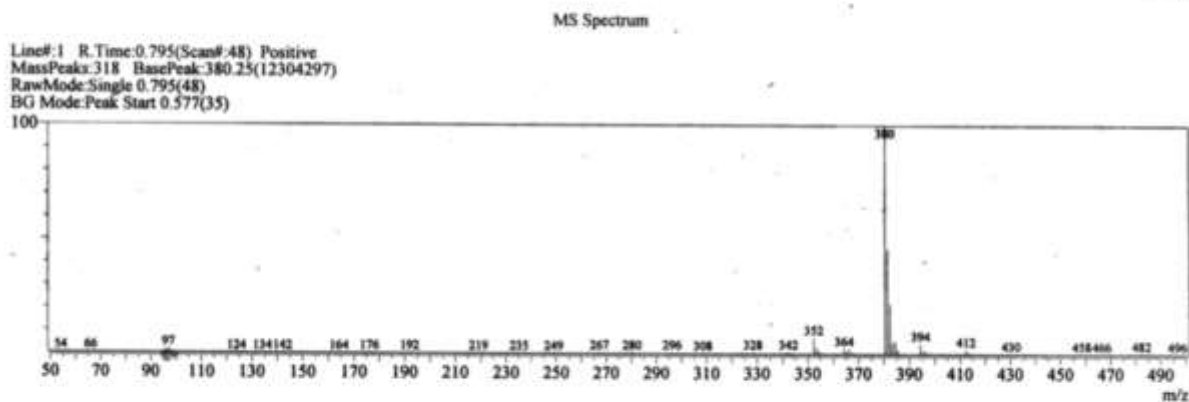

| MS Peak Table |        |        |        |           |          |       |      |        |      |
|---------------|--------|--------|--------|-----------|----------|-------|------|--------|------|
| Peak#         | R.Time | I.Time | F.Time | Area      | Height   | A/H   | Mark | %Total | Name |
| 1             | 0.795  | 0.577  | 1.010  | 304473890 | 24751492 | 12.30 |      | 100.00 |      |
|               |        |        |        | 304473890 | 24751492 |       |      | 100.00 |      |

Base m/z: 380.25 Base Int: 12304297

OPERATOR

Fig. S12 LC-MS of L3

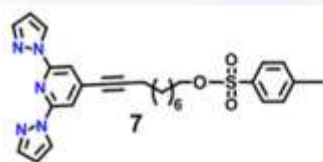

FLASH EA 1112 SERIES CHN REPORT  
SCHOOL OF CHEMISTRY  
UNIVERSITY OF HYDERABAD

Method filename:

Sample ID:

Analysis type:

Chromatogram filename:

Sample weight:

E:\Program Files\Thermo Finnigan\Eager 300 for EA1112\DATA\Sys\_data\_ex  
BPPOTS (# 12)

UnkNown

UNK-13082013-12.dat

1.112

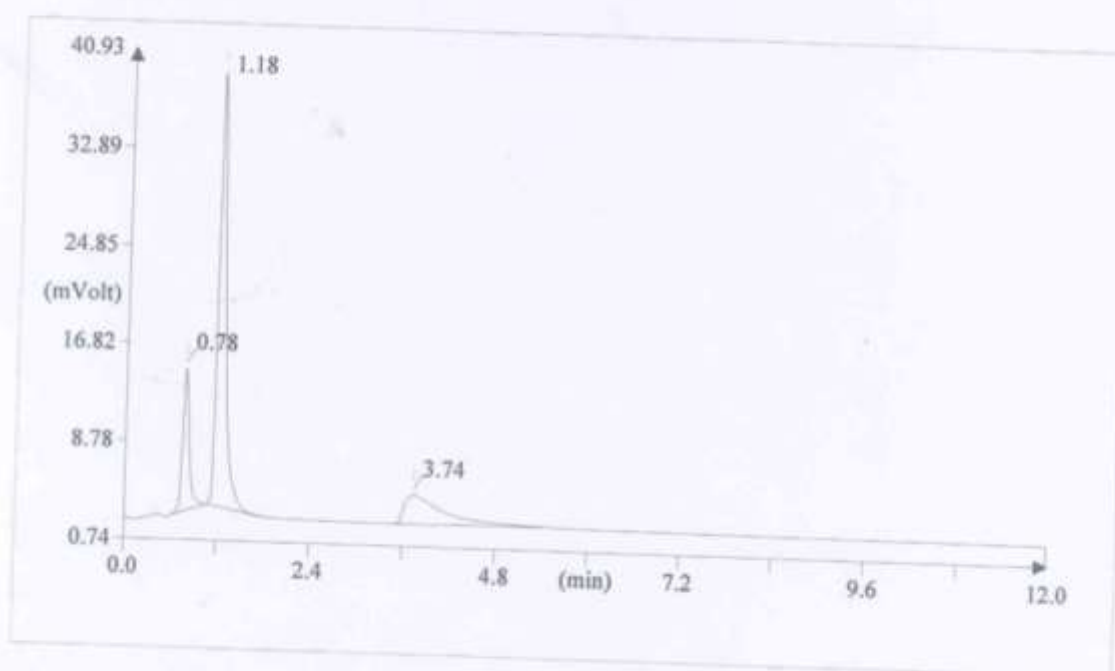

| Element Name | Element % | Ret. Time |
|--------------|-----------|-----------|
| Nitrogen     | 13.45     | 0.78      |
| Carbon       | 64.87     | 1.18      |
| Hydrogen     | 6.12      | 3.74      |

*CSL*

Fig. S13 Elemental analysis of compound 7

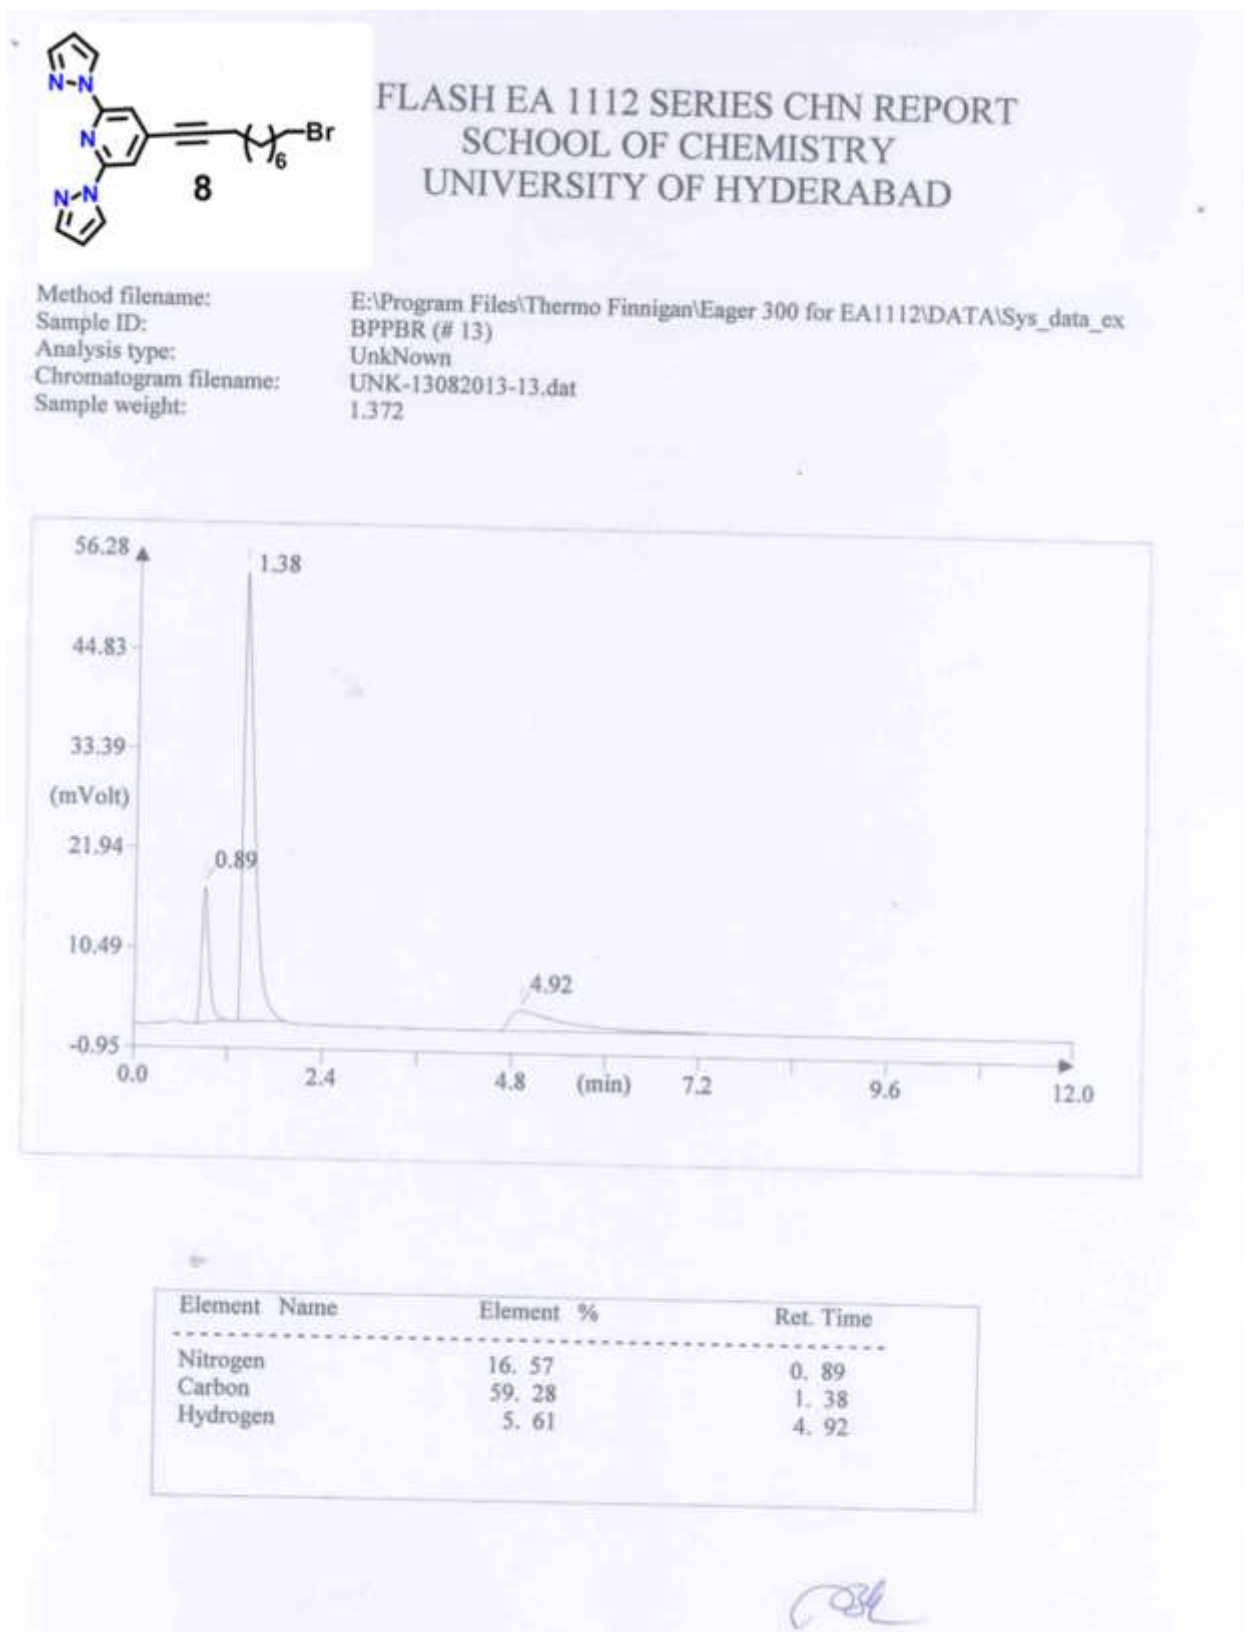

Fig. S14 Elemental analysis of compound 8

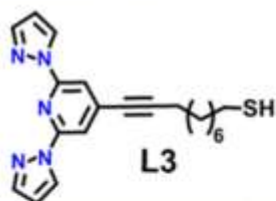

FLASH EA 1112 SERIES CHN REPORT  
SCHOOL OF CHEMISTRY  
UNIVERSITY OF HYDERABAD

Method filename:  
Sample ID:  
Analysis type:  
Chromatogram filename:  
Sample weight:

E:\Program Files\Thermo Finnigan\Eager 300 for EA1112\DATA\Sys\_data\_ex  
BPPSH (# 14)  
UnkNowm  
UNK-13082013-14.dat  
1.118

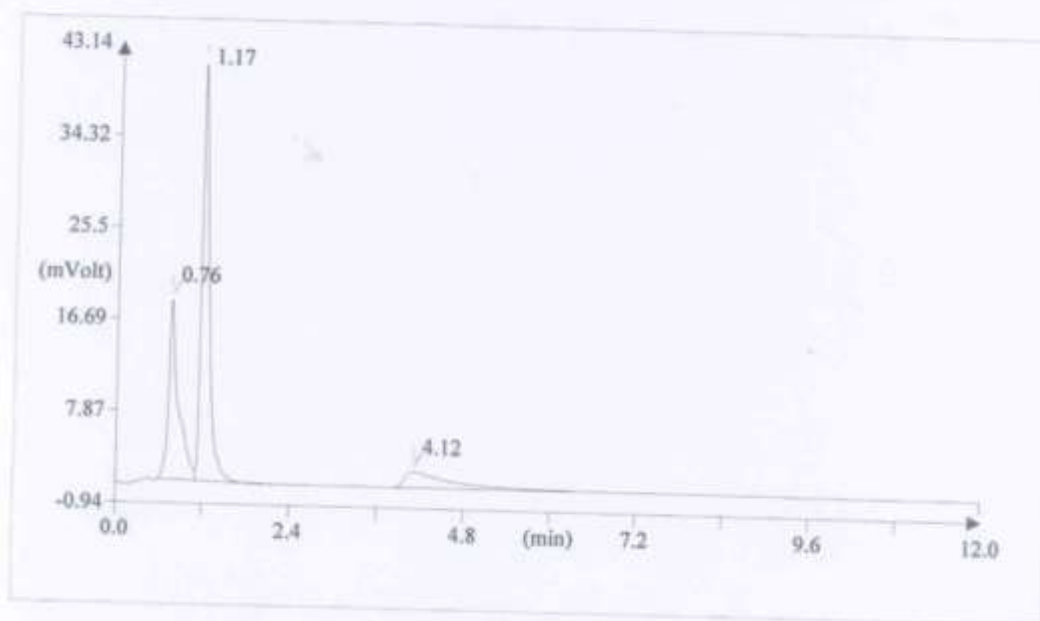

| Element Name | Element % | Ret. Time |
|--------------|-----------|-----------|
| Nitrogen     | 18.51     | 0.76      |
| Carbon       | 66.32     | 1.17      |
| Hydrogen     | 6.71      | 4.12      |

*CSH*

Fig. S15 Elemental analysis of L3

# FLASH EA 1112 SERIES CHN REPORT THERMO FINNIGAN

Method filename: C:\Program Files\Thermo Finnigan\Eager 300 for EA1112\DATA\Sys\_data\_ex  
 Sample ID: VR-01 (# 65)  
 Analysis type: UnkNown  
 Chromatogram filename: UNK-01112016-5.dat  
 Sample weight: .965

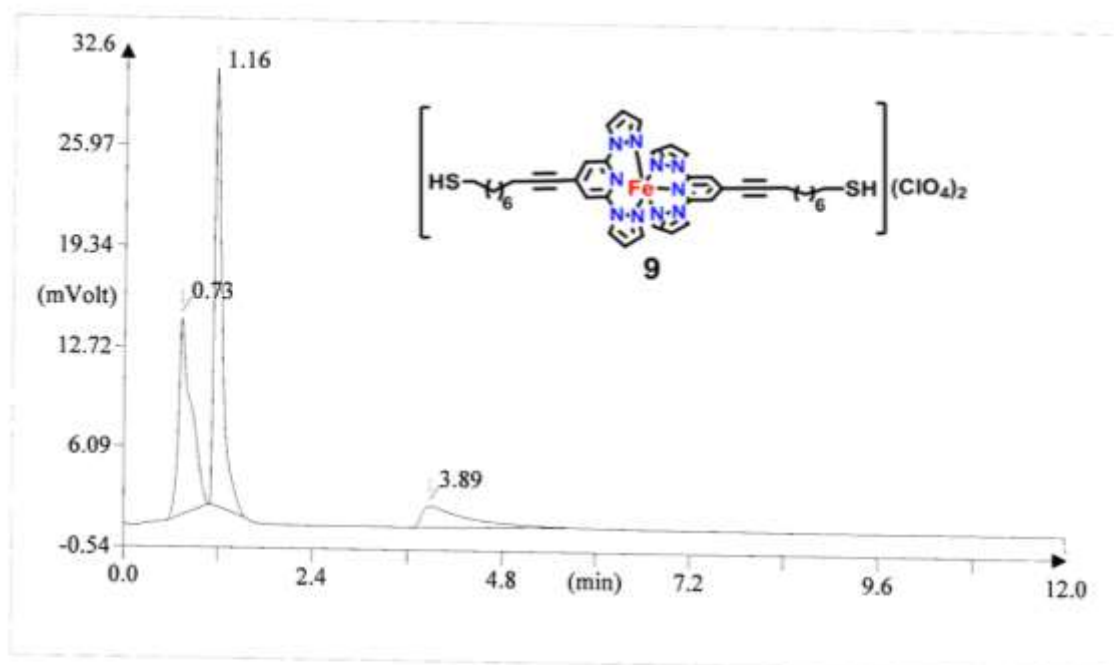

| Element Name | Element % | Ret. Time |
|--------------|-----------|-----------|
| Nitrogen     | 13.76     | 0.73      |
| Carbon       | 49.85     | 1.16      |
| Hydrogen     | 4.91      | 3.89      |

Fig. S15 Elemental analysis of compound 9

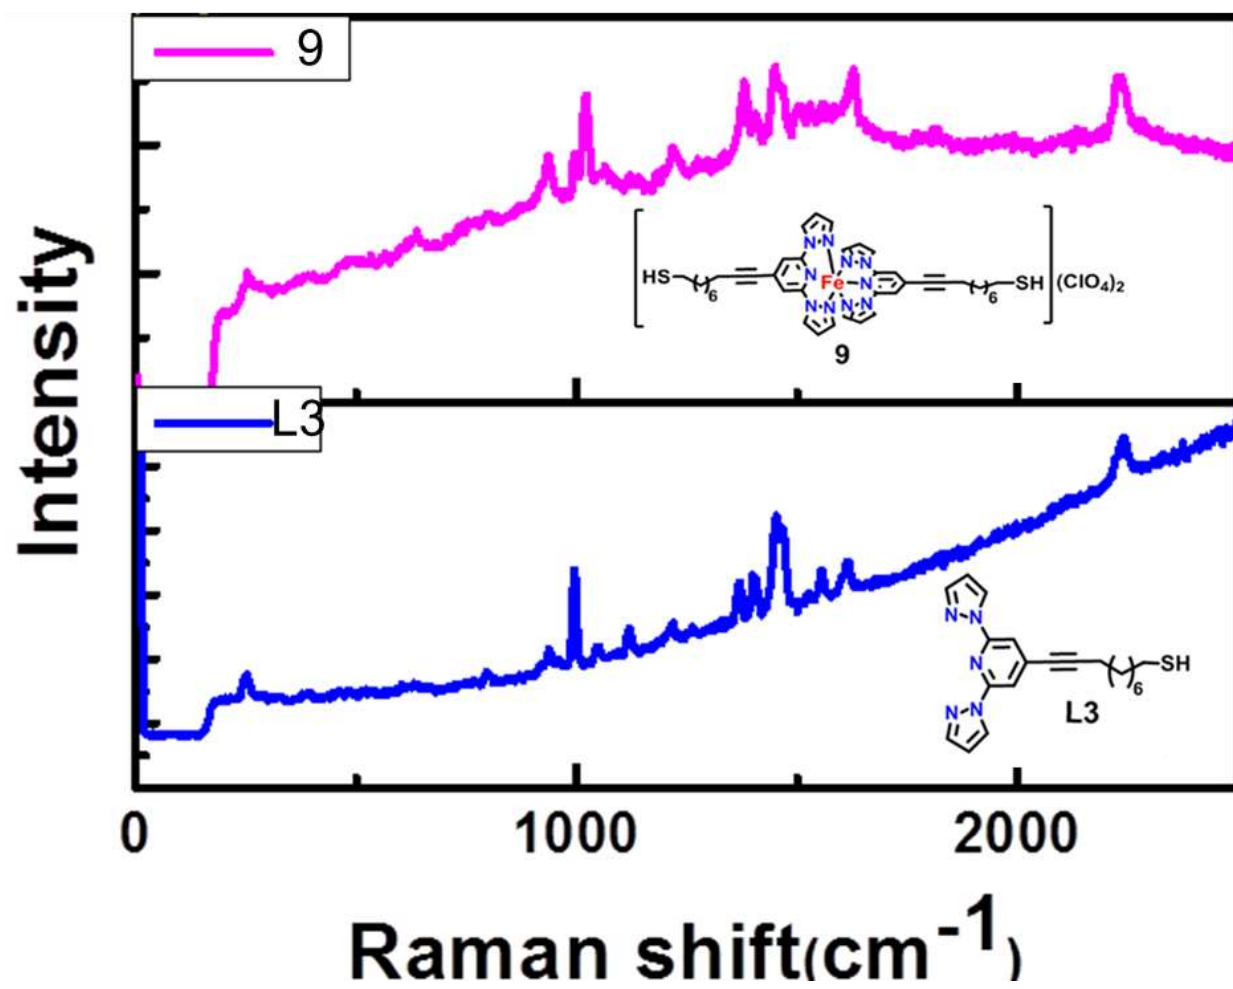

Fig. S16 Raman spectra of L3 and 9



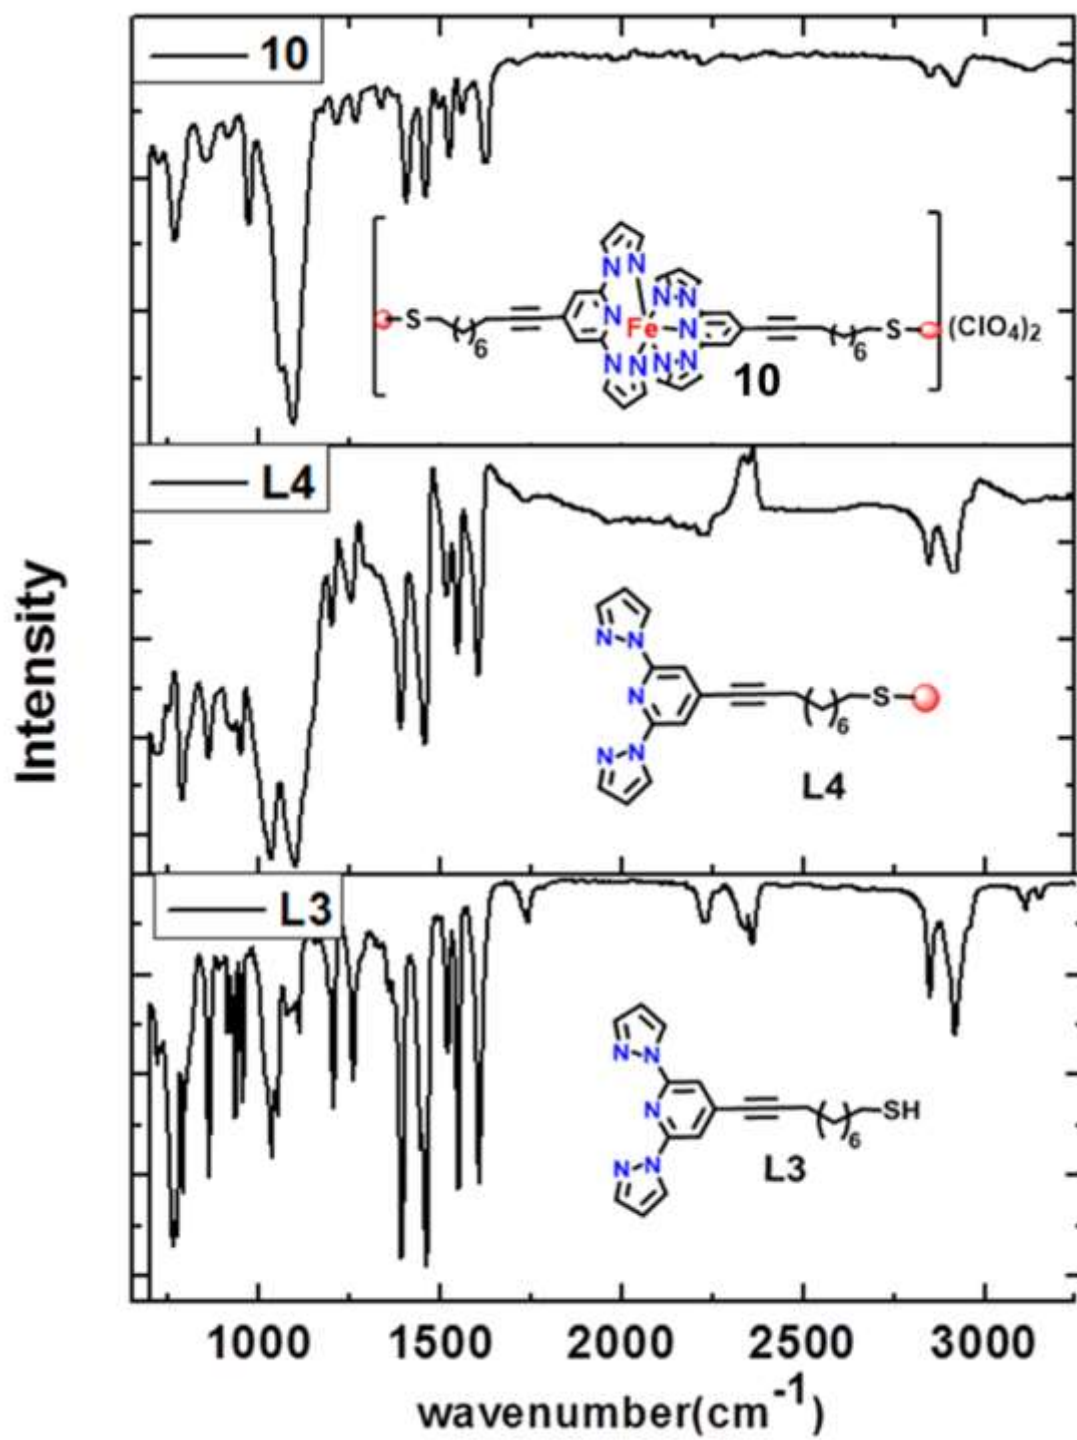

Fig. S17 FT-IR Spectra of 10, L3, and L4

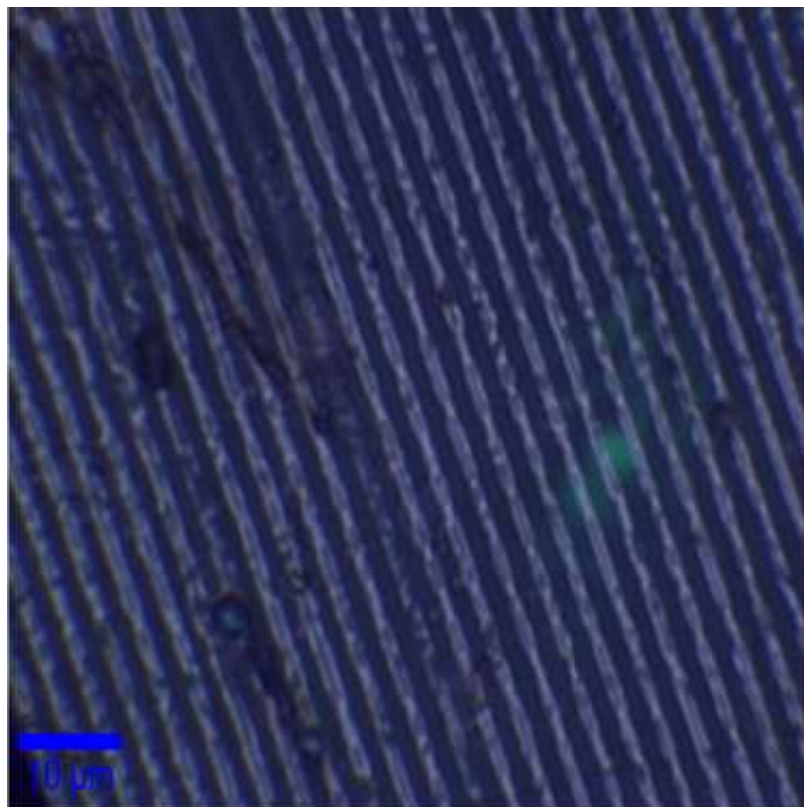

Fig. S18 Confocal Raman image of rectangle microstripes

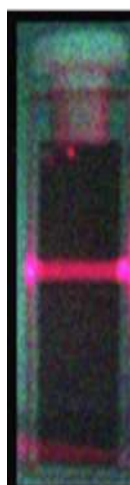

**L4**

Fig. S19 Tyndall effect of L4 solution

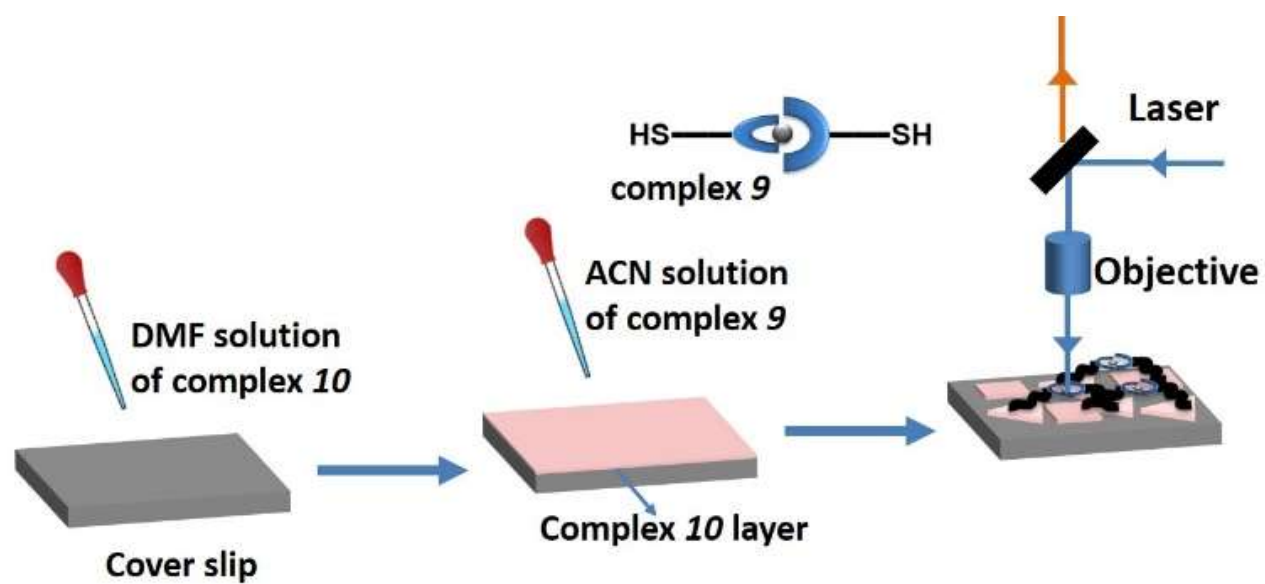

Fig. S20: Graphical representation of preparation of analyte for SERS experiment.
